# Supplementary material for: Safety and Efficacy of Paxlovid Against Omicron Variants of Coronavirus Disease 2019 in Elderly Patients
Source: Springer Nature journal article supplement (doi:10.1007/s40121-023-00760-x), 2023-01-25
Supplement: MOESM1 [file 23953490]

## **Supporting Information**

### **Safety and Efficacy of Paxlovid Against Omicron Variants of Coronavirus Disease 2019 in Elderly Patients**

Chengzhao Weng<sup>1, 5</sup> · Rongcheng Xie<sup>3</sup> · Guanjie Han<sup>4</sup> · Ya Yuan<sup>4</sup> · Shiqin Li<sup>1</sup> · Chao Wang<sup>1</sup> · Xiaofeng Wang<sup>2, 4</sup> · Wei Jiang<sup>1, 6</sup> · Libo Jiang<sup>2, 4, 5</sup>

#### **Affiliations:**

1. Department of Gastroenterology and Hepatology, Zhongshan Hospital (Xiamen), Fudan University, Xiamen 361000, China
2. Department of Orthopaedic Surgery, Zhongshan Hospital (Xiamen), Fudan University, Xiamen 361000, China
3. Department of Critical Care Medicine, Zhongshan Hospital (Xiamen), Fudan University, Xiamen 361006, China
4. Department of Orthopaedic Surgery, department of rehabilitation medicine, Zhongshan Hospital, Fudan University, Shanghai 200032, China
5. Xiamen Clinical Research Center for Cancer Therapy, Zhongshan Hospital (Xiamen), Fudan University, Xiamen 361000, China
6. Department of Gastroenterology and Hepatology, Zhongshan Hospital, Fudan University, Shanghai 200032, China

Chengzhao Weng, Rongcheng Xie and Guanjie Han have contributed to this work equally.

**Corresponding author:** E-mail address: [wang.xiaofeng@zs-hospital.sh.cn](mailto:wang.xiaofeng@zs-hospital.sh.cn) (Xiaofeng

Wang); [jiang.wei@zs-hospital.sh.cn](mailto:jiang.wei@zs-hospital.sh.cn)(Wei Jiang); [jiang.libo@zs-hospital.sh.cn](mailto:jiang.libo@zs-hospital.sh.cn) (Libo Jiang)

**Table S1** Laboratory and radiological findings of patients with COVID-19

| <b>Variables</b>                           | <b>Total</b>     | <b>Treatment</b> |                  | <b>Control</b> |  | <b><i>p</i></b> |
|--------------------------------------------|------------------|------------------|------------------|----------------|--|-----------------|
|                                            | <b>N=163</b>     | <b>group</b>     |                  | <b>group</b>   |  |                 |
|                                            |                  | <b>N = 82</b>    |                  | <b>N = 81</b>  |  |                 |
| <b>Blood routine</b>                       |                  |                  |                  |                |  |                 |
| White blood cell<br>count, $\times 10^9/L$ | 5.0 (3.9–6.0)    | 5.1 (3.9–6.1)    | 4.8 (3.8–5.9)    | 0.983          |  |                 |
| Hemoglobin<br>(g/L)                        | 124 (109–133)    | 125 (111–136)    | 122 (109–129)    | 0.183          |  |                 |
| Lymphocyte<br>count, $\times 10^9/L$       | 1.3 (1.0–1.7)    | 1.3 (0.9–1.7)    | 1.5 (1.1–1.8)    | 0.160          |  |                 |
| Platelet<br>count, $\times 10^9/L$         | 187 (148–233)    | 186 (151–233)    | 194 (138–228)    | 0.812          |  |                 |
| <b>Blood<br/>biochemistry</b>              |                  |                  |                  |                |  |                 |
| ALT, U/L                                   | 15.0 (9.7–22.0)  | 14.4 (9.2–23.2)  | 15.0 (10.0–21.8) | 0.668          |  |                 |
| AST, U/L                                   | 21.5 (18.0–27.7) | 20.0 (16.0–27.3) | 22.0 (18.0–27.9) | 0.641          |  |                 |
| Albumin, g/L                               | 37.8 (34.9–40.0) | 38.0 (35.0–41.1) | 37.1 (34.2–39.5) | 0.086          |  |                 |

|                                  |                |                  |                |                  |                |                  |       |
|----------------------------------|----------------|------------------|----------------|------------------|----------------|------------------|-------|
| Globulin, g/L                    | 27.0<br>30.0)  | (24.2–<br>29.9)  | 27.0<br>29.9)  | (24.2–<br>29.9)  | 26.7<br>30.4)  | (24.1–<br>30.4)  | 0.445 |
| Lactate<br>dehydrogenase,<br>U/L | 203<br>237)    | (179–<br>237)    | 203<br>237)    | (176–<br>237)    | 203<br>239)    | (187–<br>239)    | 0.219 |
| Serum creatinine,<br>µmol/L      | 75 (63–92)     | 76 (63–90)       | 75 (63–98)     |                  |                |                  | 0.365 |
| GFR, mL/min                      | 92.5<br>109.1) | (75.9–<br>108.7) | 92.4<br>108.7) | (77.0–<br>108.7) | 93.5<br>109.3) | (72.2–<br>109.3) | 0.699 |
| C-reactive<br>protein, mg/L      | 5.8 (3.0–15.0) | 5.8 (3.2–18.0)   | 6.5 (2.8–14.5) |                  |                |                  | 0.447 |
| <b>Coagulation<br/>function</b>  |                |                  |                |                  |                |                  |       |
| Prothrombin<br>time, s           | 11.7<br>12.5)  | (11.3–<br>12.5)  | 11.7<br>12.5)  | (11.2–<br>12.5)  | 11.7<br>12.6)  | (11.4–<br>12.6)  | 0.520 |
| aPTT, s                          | 28.4<br>31.0)  | (26.3–<br>31.2)  | 28.4<br>31.2)  | (26.7–<br>31.2)  | 28.2<br>30.8)  | (26.2–<br>30.8)  | 0.928 |
| D-dimer, ng/mL                   | 0.5 (0.3–1.0)  | 0.4 (0.3–0.8)    | 0.6 (0.4–1.1)  |                  |                |                  | 0.290 |
| <b>CT Image</b>                  |                |                  |                |                  |                |                  |       |
| Visual Severity<br>Scores        | 2 (0–2)        | 2 (0–2)          | 2 (0–3)        |                  |                |                  | 0.261 |

|                        |       |        |       |        |       |        |       |
|------------------------|-------|--------|-------|--------|-------|--------|-------|
| <b>Nucleic acid Ct</b> | 19.8  | (17.3– | 19.5  | (17.1– | 20.0  | (17.6– | 0.218 |
| <b>on admission</b>    | 24.7) |        | 23.9) |        | 24.8) |        |       |

---

COVID-19, coronavirus disease 2019; ALT, Alanine aminotransferase;  
 AST, Aspartate aminotransferase; GFR, Glomerular filtration rate; aPTT,  
 activated partial thromboplastin time; CT, computed tomography
